## Retraction

## Retraction: microRNA526b servers as a prognostic factor and exhibits tumor suppressive property by targeting Sirtuin 7 in hepatocellular carcinoma

Xin Liu<sup>1,\*</sup>, Liu Yang<sup>1,\*</sup>, Jianfeng Tu<sup>2,\*</sup>, Wenwei Cai<sup>2</sup>, Meiqi Zhang<sup>2</sup>, Zhangxuan Shou<sup>3</sup>, Yingmin Yao<sup>4</sup> and Qiuran Xu<sup>1</sup>

<sup>1</sup>Key Laboratory of Tumor Molecular Diagnosis and Individualized Medicine of Zhejiang Province, Zhejiang Provincial People's Hospital, People's Hospital of Hangzhou Medical College, Hangzhou, Zhejiang Province 310014, China

<sup>2</sup>Department of Emergency, Zhejiang Provincial People's Hospital, People's Hospital of Hangzhou Medical College, Hangzhou, Zhejiang Province 310014, China

<sup>3</sup>Department of Pharmacy, Zhejiang Provincial People's Hospital, People's Hospital of Hangzhou Medical College, Hangzhou, Zhejiang Province 310014, China

<sup>4</sup>Department of Hepatobiliary Surgery, The First Affiliated Hospital of Xi'an Jiaotong University, Xi'an, Shaanxi Province 710061, China

\*These authors have contributed equally to this work

**Published:** April 24, 2026

**Copyright:** © 2026 Liu et al. This is an open access article distributed under the terms of the [Creative Commons Attribution License](#) (CC BY 4.0), which permits unrestricted use, distribution, and reproduction in any medium, provided the original author and source are credited.

**This article has been retracted:** Oncotarget's Image Forensics investigation of this paper has identified multiple instances of internal duplications and external overlaps with earlier or concurrently published unrelated articles. These include:

### Internal Duplications:

- Figure 2C, 2F: Transwell assay images contain overlaps within Figure 2C and between Figures 2C and 2F. These also overlap with images in Figure 6C. The revised Figure 2 provided for correction also contained overlaps in 2C and between 2C and 2F.
- Figure 6C: The Transwell assay NC migration panel overlaps with the invasion panel, and two invasion panels overlap with each other.
- Figure 8: The Western blot for Snail is a duplicate of the blot for Vimentin in Figure 9.

### External Duplications:

- Figure 3B: Two panels of lung tissue H&E staining were previously published in Figure 4D of an unrelated 2014 paper [1] and were also found in 2017 and 2018 publications [2, 3].
- Figure 7B, 7D: Bright field microscopy images of hepatocellular carcinoma cells were previously published as epithelial cancer cells in Figure 3A of a 2014 paper [4].
- Figure 8: Western blot images were duplicated in Figures 5 and 7 of [5], Figure 6C of [6], and Figures 4 and 6 of [7].
- Figure 9: Western blot images were reproduced in Figure 5 of [5] and Figure 6C of [6].
- Supplementary Figure 1: The Western blot image was found in Figure 4B of [8].

Additionally, the cell lines SMMC-7721 (used as a hepatocellular carcinoma line) and LO2 (used as a human immortalized normal hepatocyte line) are known to be contaminated with HeLa cervical cancer cells [9, 10].

Although some original data was provided on PubPeer, the Oncotarget Integrity Office has not received evidence verifying its originality. Furthermore, the authors provided a corrected Figure 2, but the corrected figure contained internal overlaps. These issues raise significant concerns regarding the reliability of the data and conclusions. Consequently, the Editorial has been made to retract this paper. Oncotarget has reached out to all authors to confirm this retraction, but received no response.

Original article: Oncotarget. 2017; 8:87737–87749. <https://doi.org/10.18632/oncotarget.21209>

## REFERENCES

1. Su L, Liu X, Chai N, Lv L, Wang R, Li X, Nie Y, Shi Y, Fan D. The transcription factor FOXO4 is down-regulated and inhibits tumor proliferation and metastasis in gastric cancer. *BMC Cancer*. 2014; 14:378. <https://doi.org/10.1186/1471-2407-14-378>. [PubMed]
2. Cai W, Jiang H, Yu Y, Xu Y, Zuo W, Wang S, Su Z. RETRACTED: miR-367 regulation of DOC-2/DAB2 interactive protein promotes proliferation, migration and invasion of osteosarcoma cells. *Biomed Pharmacother*. 2017; 95:120–28. <https://doi.org/10.1016/j.biopha.2017.07.158>. [PubMed]. Retraction in: *Biomed Pharmacother*. 2023; 160:114282. <https://doi.org/10.1016/j.biopha.2023.114282>. [PubMed]
3. Pu Y, Zhang T, Wang J, Mao Z, Duan B, Long Y, Xue F, Liu D, Liu S, Gao Z. Luteolin exerts an anticancer effect on gastric cancer cells through multiple signaling pathways and regulating miRNAs. *J Cancer*. 2018; 9:3669–75. <https://doi.org/10.7150/jca.27183>. [PubMed]
4. Yu J, Xie F, Bao X, Chen W, Xu Q. miR-300 inhibits epithelial to mesenchymal transition and metastasis by targeting Twist in human epithelial cancer. *Mol Cancer*. 2014; 13:121. <https://doi.org/10.1186/1476-4598-13-121>. [PubMed]
5. Ke M, Mo L, Li W, Zhang X, Li F, Yu H. Ubiquitin ligase SMURF1 functions as a prognostic marker and promotes growth and metastasis of clear cell renal cell carcinoma. *FEBS Open Bio*. 2017; 7:577–86. <https://doi.org/10.1002/2211-5463.12204>. [PubMed]. Retraction in: *FEBS Open Bio*. 2022; 12:2258. <https://doi.org/10.1002/2211-5463.13515>. [PubMed]
6. Lin H, Hao Y, Zhao Z, Tong Y. Sirtuin 6 contributes to migration and invasion of osteosarcoma cells via the ERK1/2/MMP9 pathway. *FEBS Open Bio*. 2017; 7:1291–301. <https://doi.org/10.1002/2211-5463.12265>. [PubMed]. Retraction in: *FEBS Open Bio*. 2022; 12:2261. <https://doi.org/10.1002/2211-5463.13513>. [PubMed]
7. Tao Y, Yang S, Wu Y, Fang X, Wang Y, Song Y, Han T. MicroRNA-216a inhibits the metastasis of gastric cancer cells by targeting JAK2/STAT3-mediated EMT process. *Oncotarget*. 2017; 8:8870–81. <https://doi.org/10.18632/oncotarget.21488>. [PubMed]. Retraction in: *Oncotarget*. 2025; 16:136–37. <https://doi.org/10.18632/oncotarget.28702>. [PubMed]
8. Tao Y, Han T, Zhang T, Ma C, Sun C. LncRNA CHRF-induced miR-489 loss promotes metastasis of colorectal cancer via TWIST1/EMT signaling pathway. *Oncotarget*. 2017; 8:36410–22. <https://doi.org/10.18632/oncotarget.16850>. [PubMed]
9. Ye F, Chen C, Qin J, Liu J, Zheng C. Genetic profiling reveals an alarming rate of cross-contamination among human cell lines used in China. *FASEB J*. 2015; 29:4268–72. <https://doi.org/10.1096/fj.14-266718>. [PubMed]
10. Rebouissou S, Zucman-Rossi J, Moreau R, Qiu Z, Hui L. Note of caution: Contaminations of hepatocellular cell lines. *J Hepatol*. 2017; 67:896–97. <https://doi.org/10.1016/j.jhep.2017.08.002>. [PubMed]
